# Supplementary material
Source: PubMed Central journal article supplement (PMC4018884)
Supplement: CVI.00115-14_zcd999094976so1.pdf [file CVI.00115-14_zcd999094976so1.pdf]

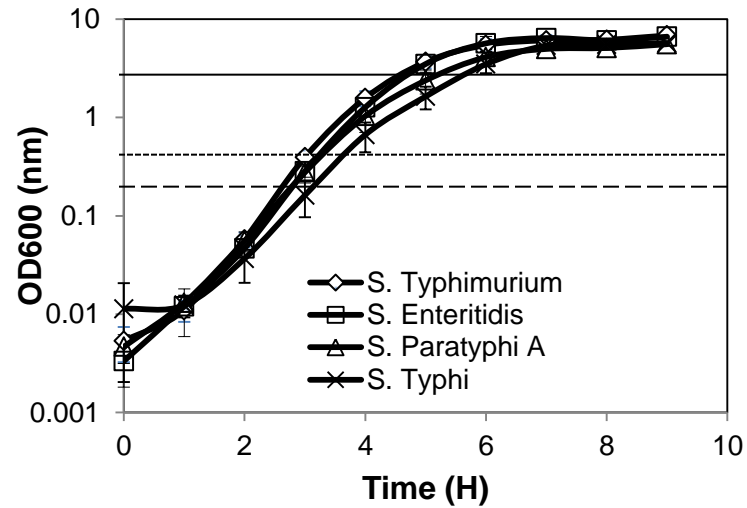

**Supplementary Figure 1.** Growth curve of *Salmonella* serovars *S. Typhimurium* D65, *S. Enteritidis* R11, *S. Typhi* Ty2 and *S. Paratyphi A* ATCC 9150. Results are mean  $\pm$  standard deviation from three independent experiments. ---, OD<sub>600</sub> 0.4; ----, OD<sub>600</sub> 0.8; and —, OD<sub>600</sub> 4.0.

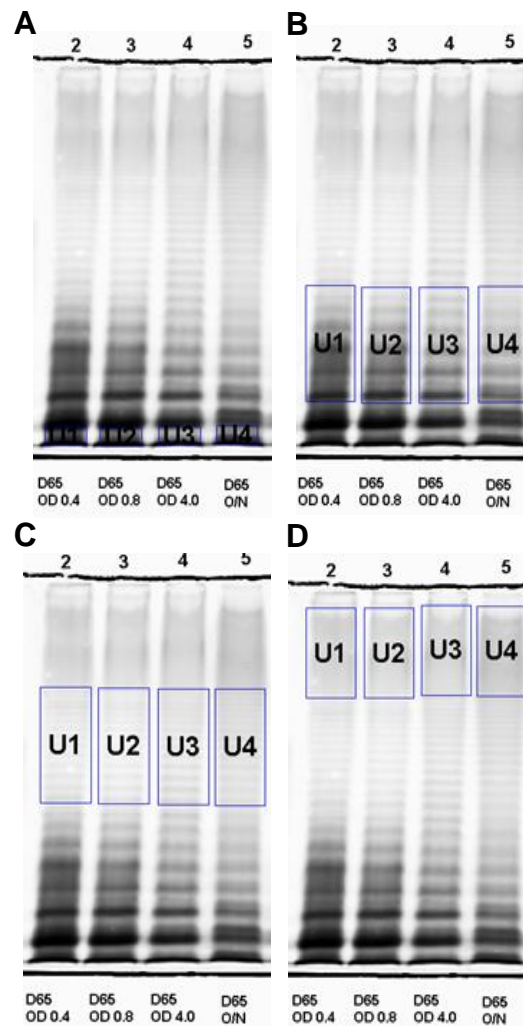

**Supplementary Figure 2. Example of LPS gel used for densitometry analysis.**

LPS gel with rectangles U1-U4 as the volume of the area measured relative to the background. (A) core, (B) short O Antigen, (C) medium O Antigen, and (D) long O Antigen.
